# Supplementary material for: Intensive Blood-Pressure Control in Hypertensive Chronic Kidney Disease
Source: Atypon-hosted journal article supplement (doi:10.1056/nejmoa0910975), 2010-09-01
Supplement: nejmoa0910975_appendix.pdf [file nejmoa0910975_appendix.pdf]

## Supplementary Appendix

This appendix has been provided by the authors to give readers additional information about their work.

Supplement to: Appel LJ, Wright JT Jr, Greene T, et al. Intensive blood-pressure control in hypertensive chronic kidney disease. *N Engl J Med* 2010;363:918-29.

(PDF updated November 16, 2010.)

## Legend for Appendix Figures

Appendix Figure 1 – Participant flow in the trial and cohort phases of AASK. Event totals during each phase indicate the numbers of patients who experienced the indicated event prior to any of the other components of the primary composite outcome of ESRD, Death, or Doubling of SCR. Once an individual experienced an event (e.g. doubling or serum creatinine), this person was no longer counted for the other events (in this case, ESRD or death), even if one of these events subsequently occurred. For this reason, counts of ESRD and death are less than the total numbers of ESRD and death that occurred in the study. Counts in this figure do not apply to the other composite outcomes (ESRD or death; ESRD or doubling of serum creatinine). In contrast, appendix tables 4-6 display total counts in the study.

Appendix Figure 2 – Among participants with baseline UP/Cr  $\leq 0.22$ , BP levels in the standard BP control group (light boxes) and intensive BP control group (dark boxes) over time in the trial and cohort phases of AASK among participants who had not yet experienced the primary study outcome (doubling of serum creatinine level, ESRD or death). Lines connect median BP at each timepoint. For each box, the upper edge corresponds to the 75<sup>th</sup> percentile and the bottom edge the 25<sup>th</sup> percentile. Note – During the first 3 years, all participants were in the trial phase. The period between 3 and 6.5 years is a mixed period that is the trial phase for early enrollees and the cohort phase for the late enrollees. After 6.5 years, all data is from the cohort phase.

Appendix Figure 3 – Among participants with baseline UP/Cr > 0.22, BP levels in the standard BP control group (light boxes) and intensive BP control group (dark boxes) over time in the trial and cohort phases of AASK among participants who had not yet experienced the primary study outcome (doubling of serum creatinine level, ESRD or death). Lines connect median BP at each timepoint. For each box, the upper edge corresponds to the 75<sup>th</sup> percentile and the bottom edge the 25<sup>th</sup> percentile. Note – During the first 3 years, all participants were in the trial phase. The period between 3 and 6.5 years is a mixed period that is the trial phase for early enrollees and the cohort phase for the late enrollees. After 6.5 years, all data is from the cohort phase. BP estimates at Year 10 are unstable because of small sample size.

Appendix Figure 1: Participant flow in the trial and cohort phases of AASK

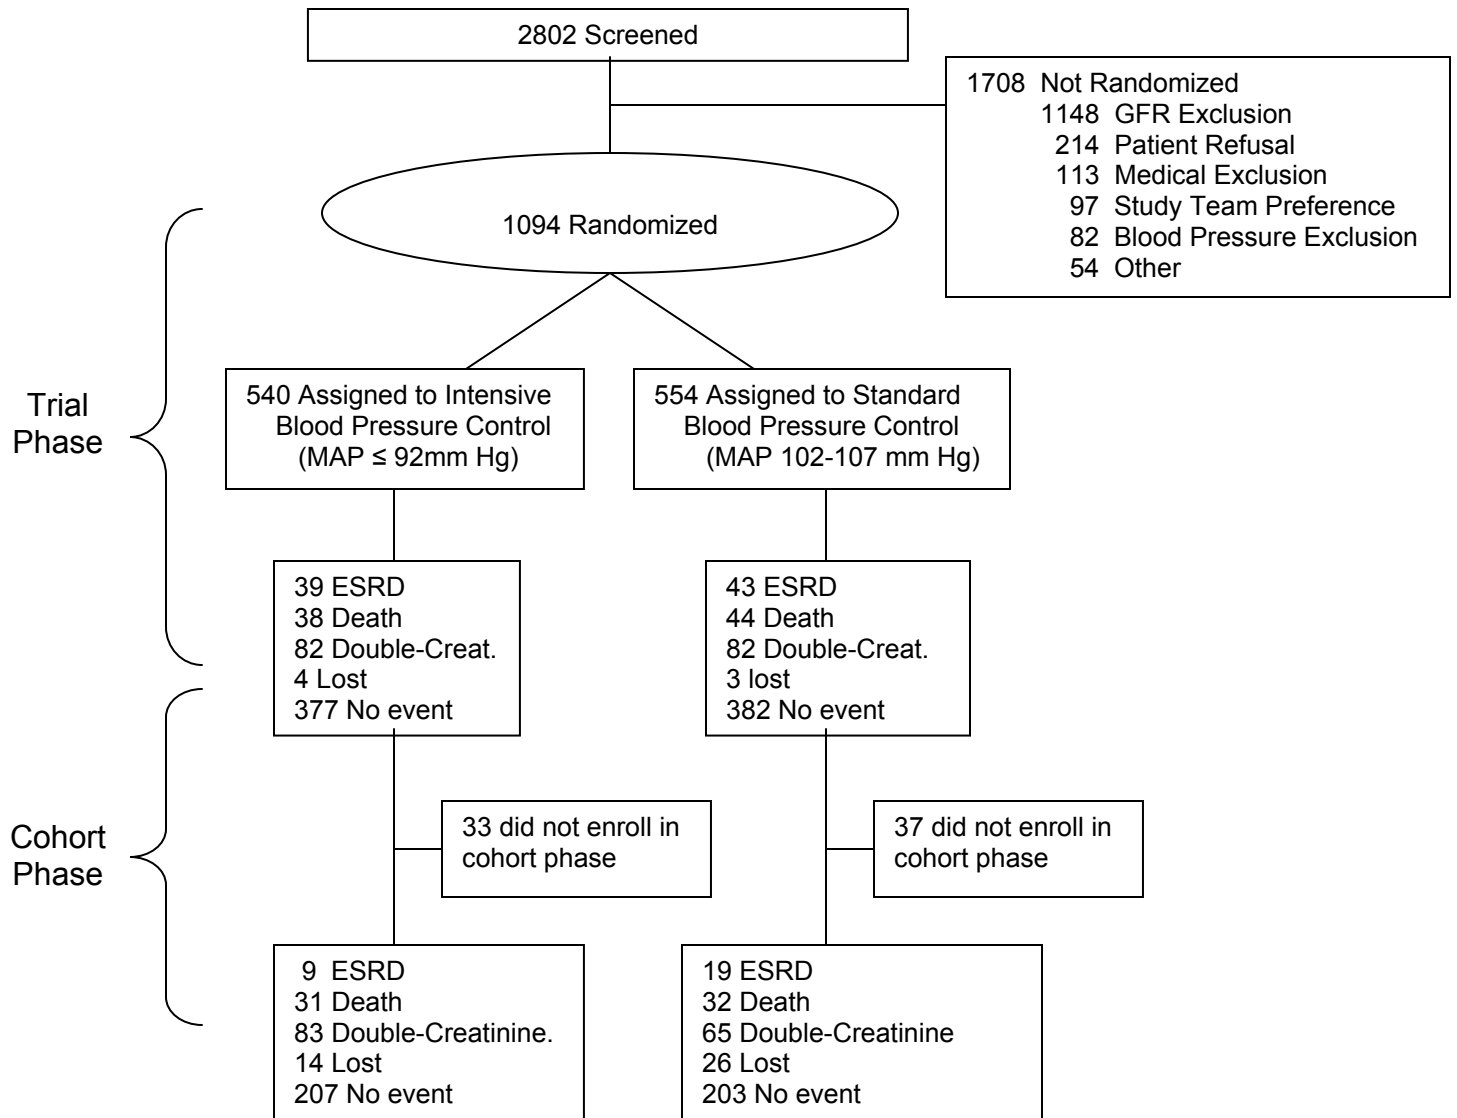

Appendix Figure 2 : BP Levels in Patients with UP/Cr  $\leq$  0.22

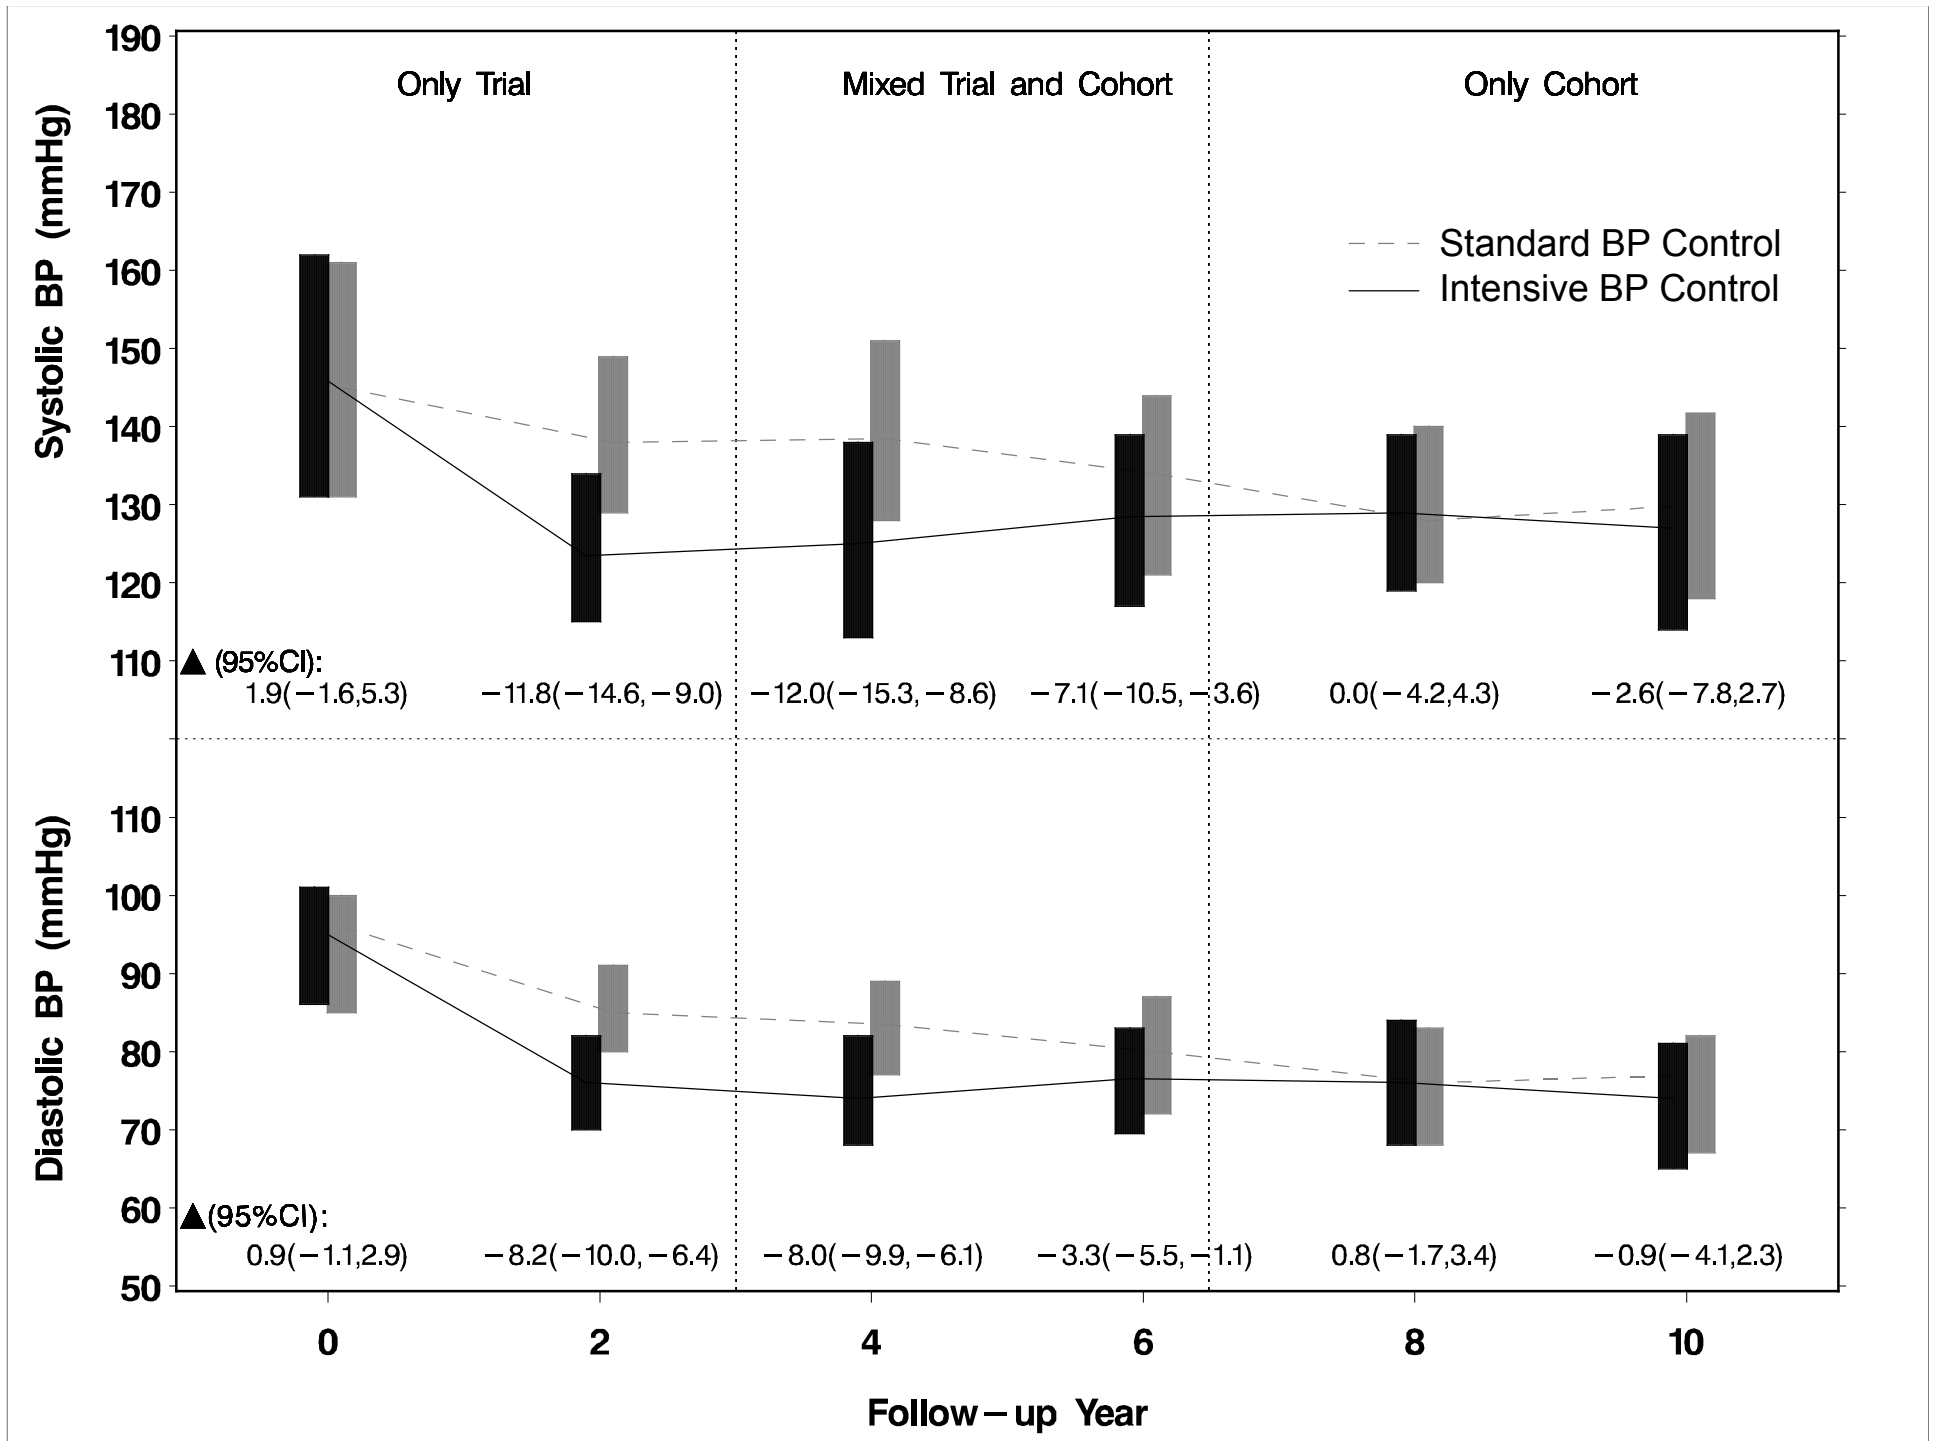

Appendix Figure 3 : BP Levels in Patients with UP/Cr > 0.22

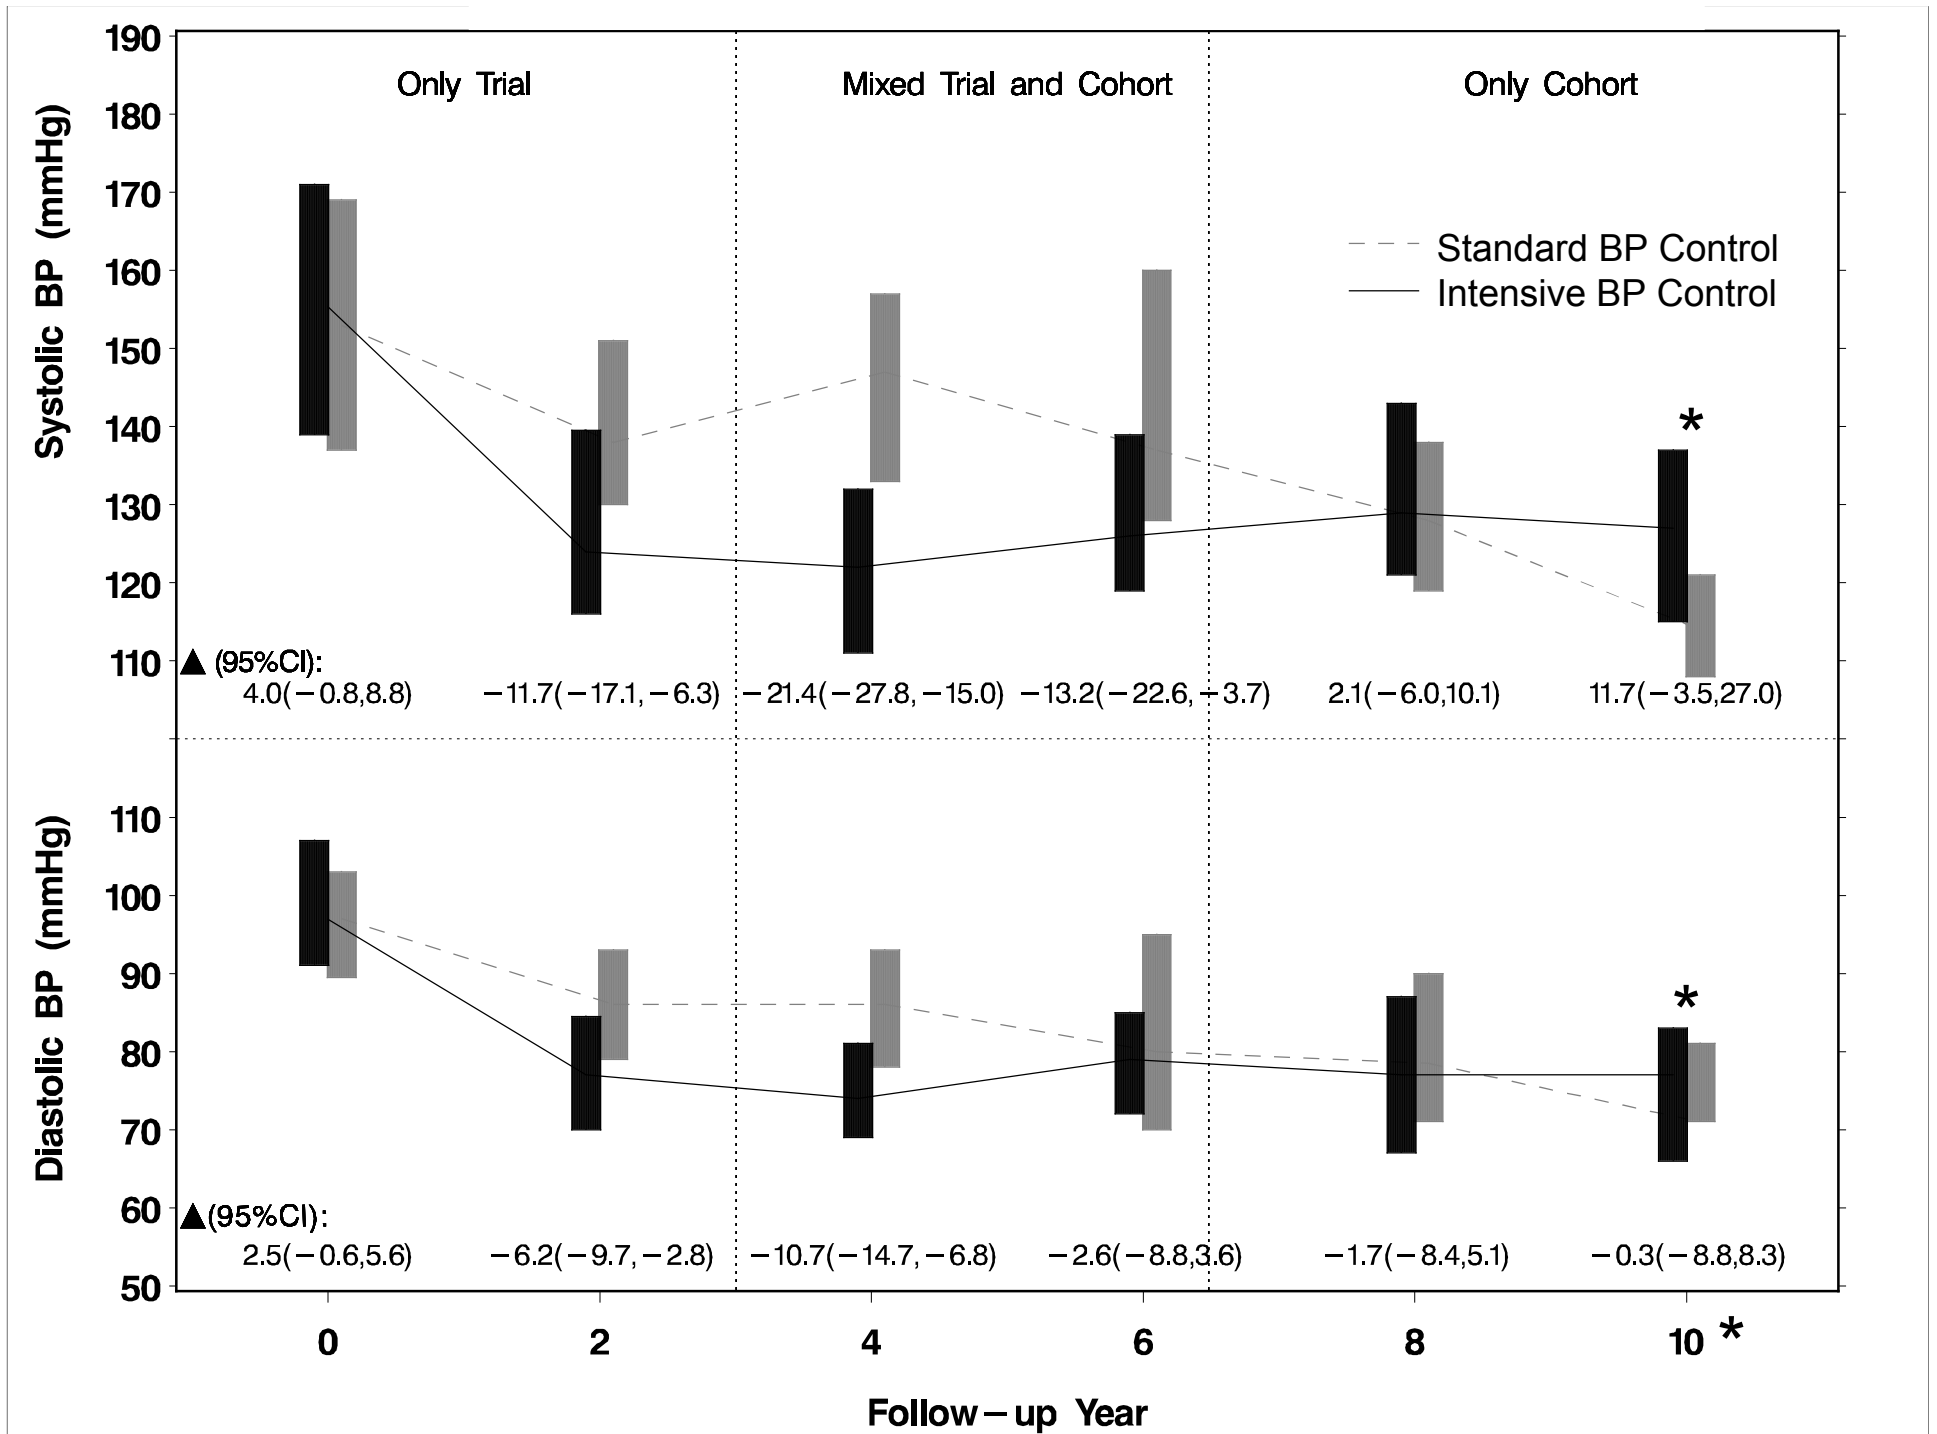

\* Unstable BP estimates because of small sample size

**Appendix Table 1: Characteristics of AASK Participants\* at Start of Cohort Phase by Randomized Group, Overall and Stratified by Baseline Urine Protein Excretion at Start of Trial**

| Variable                                  | All Participants       |                       | UP/Cr ≤ 0.22         |                     | UP/Cr > 0.22        |                    |
|-------------------------------------------|------------------------|-----------------------|----------------------|---------------------|---------------------|--------------------|
|                                           | Intensive<br>(N = 377) | Standard<br>(N = 382) | Intensive<br>(N=290) | Standard<br>(N=312) | Intensive<br>(N=86) | Standard<br>(N=68) |
| Age (yr)                                  | 60.5 ± 10.1            | 59.8 ± 10.3           | 61.8 ± 9.49          | 60.7 ± 9.64         | 56.3 ± 10.9         | 55.4 ± 12.1        |
| Female                                    | 145(38.5%)             | 152(39.8%)            | 119 (41.0%)          | 124 (39.7%)         | 26 (30.2%)          | 28 (41.2%)         |
| Current Smoker                            | 119(31.6%)             | 82 (21.5%)            | 90 (31.0%)           | 65 (20.8%)          | 28 (32.6%)          | 16 (23.5%)         |
| No High School Education                  | 156(41.4%)             | 153(40.2%)            | 124 (42.8%)          | 134 (43.1%)         | 32 (37.2%)          | 18 (26.5%)         |
| Weight(Kg)                                | 91.9 ± 22.7            | 92.1 ± 21.5           | 90.4 ± 22.5          | 91.1 ± 21.4         | 97.2 ± 22.8         | 96.6 ± 22.0        |
| Body Mass Index (kg/m <sup>2</sup> )      | 31.4 ± 7.34            | 31.5 ± 6.86           | 30.9 ± 7.05          | 31.3 ± 6.90         | 33.2 ± 8.11         | 32.6 ± 6.73        |
| Estimated GFR(ml/min/1.73m <sup>2</sup> ) | 47.0 ± 15.3            | 47.7 ± 15.0           | 49.1 ± 15.0          | 50.1 ± 14.0         | 39.4 ± 13.9         | 36.4 ± 14.1        |
| Serum Creatinine (mg/dL)                  | 1.99 ± 0.81            | 1.98 ± 0.80           | 1.87 ± 0.73          | 1.84 ± 0.68         | 2.44 ± 0.92         | 2.61 ± 0.98        |
| Urine Protein (g/day)                     | 0.07(0.04,0.25)        | 0.10(0.04,0.43)       | 0.06(0.03,0.14)      | 0.08(0.04,0.25)     | 0.45(0.16,1.17)     | 0.51(0.32,1.14)    |
| U.Protein/Creatinine                      | 0.06(0.03,0.20)        | 0.07(0.03,0.29)       | 0.04(0.02,0.09)      | 0.05(0.03,0.17)     | 0.35(0.11,0.80)     | 0.42(0.21,0.98)    |
| U.Protein/Creatinine > 0.22               | 82 (24.0%)             | 102(30.3%)            | 39 (14.7%)           | 61 (21.9%)          | 43 (58.1%)          | 41 (70.7%)         |
| Female                                    | 32 (24.6%)             | 38 (29.9%)            | 16 (15.1%)           | 21 (20.4%)          | 16 (66.7%)          | 17 (70.8%)         |
| Male                                      | 50 (23.7%)             | 64 (30.5%)            | 23 (14.4%)           | 40 (22.9%)          | 27 (54.0%)          | 24 (70.6%)         |

\*Among participants who had not experienced the primary renal outcome and who therefore remained at risk.

**Appendix Table 2: BP Levels and Medication Usage Among AASK Participants with Baseline UP/Cr  $\leq$  0.22\***

|                                               | Year Post- Randomization |          |          |          |          |          |
|-----------------------------------------------|--------------------------|----------|----------|----------|----------|----------|
|                                               | Baseline                 | 2        | 4        | 6        | 8        | 10       |
| # Trial / # Cohort                            |                          |          |          |          |          |          |
| Standard BP Control                           | 376/0                    | 326/0    | 214/32   | 44/155   | 0/185    | 0/107    |
| Intensive BP Control                          | 357/0                    | 314/0    | 217/29   | 41/147   | 0/178    | 0/111    |
| Mean SBP                                      |                          |          |          |          |          |          |
| Standard BP Control                           | 147(22)                  | 139(17)  | 139(17)  | 135(18)  | 131(20)  | 131(20)  |
| Intensive BP Control                          | 149(25)                  | 127(19)  | 127(20)  | 128(16)  | 131(21)  | 128(20)  |
| Mean DBP                                      |                          |          |          |          |          |          |
| Standard BP Control                           | 94(13)                   | 85(11)   | 83(10)   | 79(12)   | 76 (12)  | 75 (12)  |
| Intensive BP Control                          | 95(14)                   | 77(13)   | 75(11)   | 76(10)   | 77 (13)  | 74 (12)  |
| % with SBP <130 and DBP <80 mmHg              |                          |          |          |          |          |          |
| Standard BP Control                           | 9.8                      | 12.6     | 16.3     | 25.1     | 38.9     | 40.2     |
| Intensive BP Control                          | 9.5                      | 51       | 53.7     | 44.1     | 39.9     | 48.6     |
| % with SBP <140 and DBP <90 mmHg              |                          |          |          |          |          |          |
| Standard BP Control                           | 22.9                     | 40.5     | 43.5     | 61.8     | 73       | 70.1     |
| Intensive BP Control                          | 22.7                     | 77.1     | 74       | 70.2     | 74.7     | 73       |
| % with SBP $\geq$ 160 and DBP $\geq$ 100 mmHg |                          |          |          |          |          |          |
| Standard BP Control                           | 16.2                     | 3.4      | 2        | 2.5      | 3.2      | 0.9      |
| Intensive BP Control                          | 19                       | 2.2      | 2.8      | 0.5      | 3.4      | 1.8      |
| % on ACEI or ARB                              |                          |          |          |          |          |          |
| Standard BP Control                           | 39.7                     | 39.3     | 47.6     | 82.9     | 90.3     | 82.2     |
| Intensive BP Control                          | 42                       | 40.1     | 49.6     | 79.7     | 88.2     | 93.6     |
| # of HTN Med Classes                          |                          |          |          |          |          |          |
| Standard BP Control                           | 2.3(1.1)                 | 2.6(1.2) | 3.0(1.4) | 3.6(1.5) | 3.9(1.5) | 3.8(1.5) |
| Intensive BP Control                          | 2.4(1.1)                 | 3.4(1.1) | 3.5(1.1) | 3.6(1.4) | 3.7(1.4) | 4.1(1.3) |

\*During the trial phase, mean BP was 128/77 mmHg in the lower BP group and 140/85 mmHg in the usual BP group. During the cohort phase, mean BP was 132/77 mmHg in the lower BP group and 131/77 mmHg in the usual BP group. Sample sizes indicate the number of patients who remained at risk for the primary composite outcome of ESRD, Death, or Doubling of SCR at the indicated time points after randomization.

**Appendix Table 3: BP Levels and Medication Usage Among AASK Participants with Baseline UP/Cr > 0.22\***

|                                               | Baseline | 2        | Year Post- Randomization |          |          |          | 10** |
|-----------------------------------------------|----------|----------|--------------------------|----------|----------|----------|------|
| # Trial/ # Cohort                             |          |          | 4                        | 6        | 8        |          |      |
| Standard BP Control                           | 176/0    | 121/0    | 56/7                     | 2/28     | 0/22     | 0/9      |      |
| Intensive BP Control                          | 181/0    | 140/0    | 74/8                     | 15/42    | 0/41     | 0/22     |      |
| <b>Mean SBP</b>                               |          |          |                          |          |          |          |      |
| Standard BP Control                           | 154(22)  | 141(19)  | 147(19)                  | 142(28)  | 129(12)  | 115(10)  |      |
| Intensive BP Control                          | 158(24)  | 130(25)  | 125(20)                  | 129(17)  | 131(17)  | 127(21)  |      |
| <b>Mean DBP</b>                               |          |          |                          |          |          |          |      |
| Standard BP Control                           | 97(15)   | 86(12)   | 87(11)                   | 82(17)   | 78(12)   | 75(6)    |      |
| Intensive BP Control                          | 99(15)   | 80(16)   | 76(13)                   | 80(12)   | 77(13)   | 74 (12)  |      |
| <b>% with SBP &lt;130 and DBP &lt;80 mmHg</b> |          |          |                          |          |          |          |      |
| Standard BP Control                           | 5.7      | 11.6     | 6.3                      | 23.3     | 27.3     | 55.6     |      |
| Intensive BP Control                          | 1.1      | 51.4     | 59.8                     | 42.1     | 36.6     | 45.5     |      |
| <b>% with SBP &lt;140 and DBP &lt;90 mmHg</b> |          |          |                          |          |          |          |      |
| Standard BP Control                           | 14.2     | 38       | 27                       | 46.7     | 63.6     | 100      |      |
| Intensive BP Control                          | 11.6     | 72.1     | 78                       | 77.2     | 68.3     | 77.3     |      |
| <b>% with SBP ≥160 and DBP ≥100 mmHg</b>      |          |          |                          |          |          |          |      |
| Standard BP Control                           | 22.2     | 5.8      | 7.9                      | 13.3     | 0        | 0        |      |
| Intensive BP Control                          | 29.3     | 7.9      | 4.9                      | 5.3      | 0        | 0        |      |
| <b>% on ACEI or ARB</b>                       |          |          |                          |          |          |          |      |
| Standard BP Control                           | 39.4     | 42.1     | 52.4                     | 76.7     | 95.5     | 100      |      |
| Intensive BP Control                          | 34.6     | 42.1     | 45.1                     | 77.2     | 87.8     | 81.8     |      |
| <b># of HTN Med Classes</b>                   |          |          |                          |          |          |          |      |
| Standard BP Control                           | 2.5(1.2) | 3.0(1.2) | 3.0(1.2)                 | 3.7(1.3) | 4.0(1.8) | 4.2(1.9) |      |
| Intensive BP Control                          | 2.5(1.2) | 3.7(1.1) | 3.7(1.1)                 | 4.0(1.2) | 4.1(1.2) | 4.5(1.2) |      |

\*During the trial phase, mean BP was 132/80 mmHg in the lower BP group and 144/87 mmHg in the usual BP group. During the cohort phase, mean BP was 134/80 mmHg in the lower BP group and 136/81 mmHg in the usual BP group. Sample sizes indicate the number of patients who remained at risk for the primary composite outcome of ESRD, Death, or Doubling of SCR at the indicated time points after randomization.

\*\*Unstable BP estimates because of small sample size.

**Appendix Table 4: Mortality, CVD Events, and Hospitalizations by Randomized Group, All Participants**

|                                             | <u>Intensive Control</u> |              | <u>Standard Control</u> |              | <u>Intensive vs Standard</u> |                |
|---------------------------------------------|--------------------------|--------------|-------------------------|--------------|------------------------------|----------------|
|                                             | <u># events</u>          | <u>Rate*</u> | <u># events</u>         | <u>Rate*</u> | <u>HR</u>                    | <u>P-value</u> |
| Total Mortality Before ESRD                 |                          |              |                         |              |                              |                |
| Trial Phase                                 | 38/540                   | 1.6          | 47/554                  | 2            | 0.75 (0.49,1.15)             | 0.19           |
| Cohort Phase                                | 48/412                   | 2.7          | 44/411                  | 2.6          | 0.95 (0.63,1.44)             | 0.81           |
| Both                                        | 86/540                   | 2.1          | 91/554                  | 2.2          | 0.85 (0.63,1.14)             | 0.29           |
| CV Death                                    |                          |              |                         |              |                              |                |
| Trial Phase                                 | 16/540                   | 0.7          | 15/554                  | 0.6          | 1.00 (0.49,2.02)             | 0.99           |
| Cohort Phase                                | 19/350                   | 1.3          | 9/341                   | 0.6          | 1.86 (0.84,4.13)             | 0.13           |
| Both                                        | 35/540                   | 0.9          | 24/554                  | 0.6          | 1.32 (0.78,2.23)             | 0.3            |
| CV Composite                                |                          |              |                         |              |                              |                |
| Trial Phase                                 | 71/540                   | 3.2          | 78/554                  | 3.5          | 0.87 (0.63,1.21)             | 0.41           |
| Cohort Phase                                | 45/322                   | 3.4          | 31/307                  | 2.6          | 1.22 (0.77,1.94)             | 0.39           |
| Both                                        | 116/540                  | 3.3          | 109/554                 | 3.2          | 0.98 (0.75,1.27)             | 0.87           |
| Stroke Event                                |                          |              |                         |              |                              |                |
| Trial Phase                                 | 26/540                   | 1.1          | 29/554                  | 1.3          | 0.87 (0.51,1.47)             | 0.6            |
| Cohort Phase                                | 15/337                   | 1.1          | 15/327                  | 1.1          | 0.87 (0.43,1.79)             | 0.71           |
| Both                                        | 41/540                   | 1.1          | 44/554                  | 1.2          | 0.87 (0.57,1.33)             | 0.52           |
| Heart Failure Event                         |                          |              |                         |              |                              |                |
| Trial Phase                                 | 27/540                   | 1.2          | 23/554                  | 1            | 1.11 (0.63,1.94)             | 0.71           |
| Cohort Phase                                | 22/341                   | 1.5          | 17/329                  | 1.3          | 1.13 (0.60,2.14)             | 0.71           |
| Both                                        | 49/540                   | 1.3          | 40/554                  | 1.1          | 1.12 (0.73,1.71)             | 0.6            |
| Major CAD Event                             |                          |              |                         |              |                              |                |
| Trial Phase                                 | 19/540                   | 0.8          | 23/554                  | 1            | 0.80 (0.44,1.48)             | 0.48           |
| Cohort Phase                                | 18/339                   | 1.3          | 7/329                   | 0.5          | 2.29 (0.95,5.50)             | 0.06           |
| Both                                        | 37/540                   | 1            | 30/554                  | 0.8          | 1.16 (0.71,1.88)             | 0.55           |
| Overall rate of CV Events                   |                          |              |                         |              |                              |                |
| Trial Phase                                 | 108/540                  | 4.1          | 94/554                  | 3.5          | 1.11 (0.78                   | 0.57           |
| Cohort Phase                                | 70/350                   | 4.7          | 58/341                  | 4.1          | 1.08 (0.72                   | 0.74           |
| Both                                        | 178/540                  | 4.6          | 152/554                 | 4            | 1.03 (0.89,1.20)             | 0.55           |
| First hospitalization (any cause)           |                          |              |                         |              |                              |                |
| Trial Phase                                 | 256/540                  | 15.3         | 256/554                 | 14.3         | 1.05 (0.88,1.24)             | 0.62           |
| Cohort Phase                                | 84/205                   | 11.8         | 77/201                  | 11.4         | 0.99 (0.73,1.35)             | 0.95           |
| Both                                        | 340/540                  | 14.3         | 332/554                 | 13.4         | 1.03 (0.89,1.20)             | 0.67           |
| Overall rate of hospitalization (any cause) |                          |              |                         |              |                              |                |
| Trial Phase                                 | 518/540                  | 19.9         | 519/554                 | 19.4         | 0.98 ( 0.81 ,1.2)            | 0.87           |
| Cohort Phase                                | 321/350                  | 21.6         | 352/341                 | 25.1         | 0.83 ( 0.77                  | 0.13           |
| Both                                        | 839/540                  | 21.9         | 870/540                 | 23.1         | 0.92 ( 0.78                  | 0.32           |

\*Rate is number of events per 100 person-years. Summarized are CV events and hospitalizations prior to ESRD, and all cause mortality, including deaths prior to and after ESRD. The overall rate of hospitalization and the overall rate of CV Events refer to the rates of all events of the indicated type, including multiple events per patient. For these two outcomes, the # at risk at the start of the cohort phase includes all 691 enrollees into the cohort study. Only the first event is considered for all remaining event categories in the table. For all of these event categories except for mortality, the # at risk at the start of the cohort study was the # of cohort study enrollees in which neither the first event nor ESRD had occurred prior to the start of the cohort. For total mortality, the # at risk at the start of the cohort includes all randomized patients who were known to have survived to the start of the cohort, irrespective of whether they had initiated dialysis by this time.

**Appendix Table 5: Mortality, CVD Events, and Hospitalizations by Randomized Group, UP/Cr  $\leq$  0.22**

|                                             | <u>Intensive Control</u> |              | <u>Standard Control</u> |              | <u>Intensive vs Standard</u> |                |
|---------------------------------------------|--------------------------|--------------|-------------------------|--------------|------------------------------|----------------|
|                                             | <u># events</u>          | <u>Rate*</u> | <u># events</u>         | <u>Rate*</u> | <u>HR</u>                    | <u>P-value</u> |
| Total Mortality Before ESRD                 |                          |              |                         |              |                              |                |
| Trial Phase                                 | 22/357                   | 1.4          | 29/376                  | 1.7          | 0.74 (0.43,1.30)             | 0.3            |
| Cohort Phase                                | 38/307                   | 2.7          | 34/323                  | 2.4          | 1.10 (0.69,1.75)             | 0.69           |
| Both                                        | 60/357                   | 2            | 63/376                  | 2            | 0.94 (0.66,1.34)             | 0.73           |
| CV Death                                    |                          |              |                         |              |                              |                |
| Trial Phase                                 | 10/357                   | 0.6          | 9/376                   | 0.5          | 1.14 (0.46,2.81)             | 0.78           |
| Cohort Phase                                | 17/266                   | 1.5          | 7/274                   | 0.6          | 2.31 (0.95,5.60)             | 0.06           |
| Both                                        | 27/357                   | 1            | 16/376                  | 0.5          | 1.66 (0.89,3.09)             | 0.11           |
| CV Composite                                |                          |              |                         |              |                              |                |
| Trial Phase                                 | 43/357                   | 2.8          | 49/376                  | 3            | 0.88 (0.58,1.33)             | 0.54           |
| Cohort Phase                                | 38/245                   | 3.7          | 25/247                  | 2.4          | 1.44 (0.87,2.39)             | 0.16           |
| Both                                        | 81/357                   | 3.1          | 74/376                  | 2.8          | 1.07 (0.78,1.47)             | 0.66           |
| Stroke Event                                |                          |              |                         |              |                              |                |
| Trial Phase                                 | 20/357                   | 1.3          | 22/376                  | 1.3          | 0.93 (0.50,1.70)             | 0.8            |
| Cohort Phase                                | 12/254                   | 1.1          | 13/262                  | 1.2          | 0.89 (0.40,1.95)             | 0.77           |
| Both                                        | 32/357                   | 1.2          | 35/376                  | 1.3          | 0.91 (0.56,1.47)             | 0.7            |
| Heart Failure Event                         |                          |              |                         |              |                              |                |
| Trial Phase                                 | 12/357                   | 0.7          | 11/376                  | 0.6          | 1.12 (0.49,2.54)             | 0.79           |
| Cohort Phase                                | 17/261                   | 1.5          | 13/268                  | 1.1          | 1.32 (0.64,2.72)             | 0.46           |
| Both                                        | 29/357                   | 1.1          | 24/376                  | 0.8          | 1.23 (0.71,2.11)             | 0.46           |
| Major CAD Event                             |                          |              |                         |              |                              |                |
| Trial Phase                                 | 11/357                   | 0.7          | 15/376                  | 0.9          | 0.73 (0.33,1.60)             | 0.43           |
| Cohort Phase                                | 16/259                   | 1.4          | 6/264                   | 0.5          | 2.62 (1.02,6.72)             | 0.05           |
| Both                                        | 27/357                   | 1            | 21/376                  | 0.7          | 1.28 (0.72,2.28)             | 0.39           |
| Overall rate of CV Events                   |                          |              |                         |              |                              |                |
| Trial Phase                                 | 66/357                   | 3.8          | 61/376                  | 3.4          | 1.11 (0.72)                  | 0.63           |
| Cohort Phase                                | 54/266                   | 4.6          | 47/266                  | 3.9          | 1.13 (0.68)                  | 0.63           |
| Both                                        | 120/357                  | 4.3          | 108/376                 | 3.7          | 1.12 (0.79)                  | 0.52           |
| First hospitalization (any cause)           |                          |              |                         |              |                              |                |
| Trial Phase                                 | 163/357                  | 13.9         | 168/376                 | 12.8         | 1.08 (0.87,1.34)             | 0.5            |
| Cohort Phase                                | 66/158                   | 11.8         | 61/160                  | 10.7         | 1.08 (0.76,1.53)             | 0.67           |
| Both                                        | 229/357                  | 13.2         | 228/376                 | 12.1         | 1.08 (0.90,1.30)             | 0.43           |
| Overall rate of hospitalization (any cause) |                          |              |                         |              |                              |                |
| Trial Phase                                 | 302/357                  | 17.6         | 336/376                 | 18.5         | 0.94 ( 0.73                  | 0.63           |
| Cohort Phase                                | 257/266                  | 22           | 276/266                 | 23.1         | 0.94 ( 0.73                  | 0.66           |
| Both                                        | 559/357                  | 20           | 611/376                 | 20.9         | 0.94 ( 0.78                  | 0.55           |

\*Rate is number of events per 100 person-years. Summarized are CV events and hospitalizations prior to ESRD, and all cause mortality, including deaths prior to and after ESRD. The overall rate of hospitalization and the overall rate of CV Events refer to the rates of all events of the indicated type, including multiple events per patient. For these two outcomes, the # at risk at the start of the cohort phase includes all 691 enrollees into the cohort study. Only the first event is considered for all remaining event categories in the table. For all of these event categories except for mortality, the # at risk at the start of the cohort study was the # of cohort study enrollees in which neither the first event nor ESRD had occurred prior to the start of the cohort. For total mortality, the # at risk at the start of the cohort includes all randomized patients who were known to have survived to the start of the cohort, irrespective of whether they had initiated dialysis by this time.

**Appendix Table 6: Mortality, CVD Events, and Hospitalizations by Randomized Group, UP/Cr > 0.22**

|                                             | <u>Intensive Control</u> |       | <u>Standard Control</u> |       | <u>Intensive vs Standard</u> |         |
|---------------------------------------------|--------------------------|-------|-------------------------|-------|------------------------------|---------|
|                                             | # events                 | Rate* | # events                | Rate* | HR                           | P-value |
| Total Mortality Before ESRD                 |                          |       |                         |       |                              |         |
| Trial Phase                                 | 16/181                   | 2.2   | 18/176                  | 2.9   | 0.73 (0.37,1.45)             | 0.37    |
| Cohort Phase                                | 10/104                   | 2.6   | 9/86                    | 3.5   | 0.73 (0.29,1.83)             | 0.5     |
| Both                                        | 26/181                   | 2.4   | 27/176                  | 3     | 0.73 (0.42,1.27)             | 0.27    |
| CV Death                                    |                          |       |                         |       |                              |         |
| Trial Phase                                 | 6/181                    | 0.8   | 6/176                   | 1     | 0.90 (0.28,2.85)             | 0.86    |
| Cohort Phase                                | 2/83                     | 0.6   | 2/66                    | 1     | 0.69 (0.09,5.08)             | 0.72    |
| Both                                        | 8/181                    | 0.8   | 8/176                   | 1     | 0.84 (0.31,2.30)             | 0.73    |
| CV Composite                                |                          |       |                         |       |                              |         |
| Trial Phase                                 | 27/181                   | 4.1   | 29/176                  | 4.9   | 0.82 (0.48,1.40)             | 0.46    |
| Cohort Phase                                | 7/76                     | 2.5   | 6/59                    | 3.3   | 0.61 (0.20,1.87)             | 0.39    |
| Both                                        | 34/181                   | 3.6   | 35/176                  | 4.5   | 0.79 (0.49,1.28)             | 0.34    |
| Stroke Event                                |                          |       |                         |       |                              |         |
| Trial Phase                                 | 6/181                    | 0.9   | 7/176                   | 1.1   | 0.69 (0.23,2.09)             | 0.51    |
| Cohort Phase                                | 3/82                     | 1     | 2/64                    | 1     | 0.69 (0.10,4.50)             | 0.69    |
| Both                                        | 9/181                    | 0.9   | 9/176                   | 1.1   | 0.71 (0.28,1.84)             | 0.48    |
| Heart Failure Event                         |                          |       |                         |       |                              |         |
| Trial Phase                                 | 14/181                   | 2     | 12/176                  | 2     | 1.00 (0.45,2.20)             | 1       |
| Cohort Phase                                | 5/79                     | 1.7   | 4/60                    | 2.1   | 0.68 (0.18,2.64)             | 0.58    |
| Both                                        | 19/181                   | 1.9   | 16/176                  | 2     | 0.92 (0.46,1.82)             | 0.8     |
| Major CAD Event                             |                          |       |                         |       |                              |         |
| Trial Phase                                 | 7/181                    | 1     | 8/176                   | 1.3   | 0.75 (0.26,2.12)             | 0.58    |
| Cohort Phase                                | 2/79                     | 0.7   | 1/64                    | 0.5   | 0.41 (0.03,6.54)             | 0.53    |
| Both                                        | 9/181                    | 0.9   | 9/176                   | 1.1   | 0.76 (0.29,2.00)             | 0.58    |
| Overall rate of CV Events                   |                          |       |                         |       |                              |         |
| Trial Phase                                 | 41/181                   | 4.7   | 33/176                  | 3.8   | 1.05(0.6 , 1.83)             | 0.86    |
| Cohort Phase                                | 16/83                    | 5.1   | 11/66                   | 5.4   | 0.95(0.44,2.52)              | 0.91    |
| Both                                        | 57/181                   | 5.5   | 44/176                  | 5.3   | 1.01(0.60,1.70)              | 0.97    |
| First hospitalization (any cause)           |                          |       |                         |       |                              |         |
| Trial Phase                                 | 92/181                   | 18.5  | 87/176                  | 18.4  | 1.00 (0.74,1.35)             | 0.9997  |
| Cohort Phase                                | 17/46                    | 11.4  | 16/40                   | 15.2  | 0.67 (0.34,1.35)             | 0.266   |
| Both                                        | 109/181                  | 16.9  | 103/176                 | 17.8  | 0.95 (0.72,1.25)             | 0.7252  |
| Overall rate of hospitalization (any cause) |                          |       |                         |       |                              |         |
| Trial Phase                                 | 214/181                  | 24.3  | 182/176                 | 21.2  | 1.1 ( 0.8 , 1.52             | 0.55    |
| Cohort Phase                                | 63/83                    | 20.2  | 76/66                   | 37.1  | 0.54 (0.58,2.1)              | 0.06    |
| Both                                        | 277/181                  | 27    | 258/176                 | 30.9  | 0.91(0.66,1.26)              | 0.58    |

\*Rate is number of events per 100 person-years. Summarized are CV events and hospitalizations prior to ESRD, and all cause mortality, including deaths prior to and after ESRD. The overall rate of hospitalization and the overall rate of CV Events refer to the rates of all events of the indicated type, including multiple events per patient. For these two outcomes, the # at risk at the start of the cohort phase includes all 691 enrollees into the cohort study. Only the first event is considered for all remaining event categories in the table. For all of these event categories except for mortality, the # at risk at the start of the cohort study was the # of cohort study enrollees in which neither the first event nor ESRD had occurred prior to the start of the cohort. For total mortality, the # at risk at the start of the cohort includes all randomized patients who were known to have survived to the start of the cohort, irrespective of whether they had initiated dialysis by this time.
